# Supplementary material for: Tracing the spatial propagation of river inlet water into an agricultural polder area using anthropogenic gadolinium
Source: Copernicus journal article supplement (doi:10.5194/hess-16-2405-2012), 2012-08-02
Supplement: Supplementary file 1 [file hess-16-2405-2012-supplement.zip]

Archive with 2 entries (2 files):
- AppendixB.pdf
- AppendixA.pdf
