# Supplementary material for: Tracing the spatial propagation of river inlet water into an agricultural polder area using anthropogenic gadolinium
Source: Copernicus journal article supplement (doi:10.5194/hess-16-2405-2012), 2012-08-02
Supplement: Supplementary file 1 [file hess-16-2405-2012-supplement.zip › AppendixB.pdf]

## Appendix B: REE-profile data

| location no | date     | X-coord (RD) | Y-coord (RD) | gd anomaly | La       | Ce       | Pr       | Nd       | Sm       | Eu       | Gd       | Tb       | Dy       | Er       | Tm       | Yb       | Lu       |
|-------------|----------|--------------|--------------|------------|----------|----------|----------|----------|----------|----------|----------|----------|----------|----------|----------|----------|----------|
| 1           | 5-Aug-10 | 157900       | 425850       | 5.9        | 3.34E-04 | 3.19E-04 | 4.48E-04 | 4.77E-04 | 1.00E-03 | 9.33E-04 | 4.89E-03 | 7.41E-04 | 9.86E-04 | 1.45E-03 | 1.12E-03 | 2.18E-03 | 2.60E-03 |
| 2           | 5-Aug-10 | 162519       | 427478       | 8.6        | 2.75E-04 | 1.23E-04 | 2.35E-04 | 3.73E-04 | 6.21E-04 | 1.53E-03 | 6.93E-03 | 8.94E-04 | 7.48E-04 | 1.22E-03 | 1.84E-03 | 1.88E-03 | 2.81E-03 |
| 3           | 5-Aug-10 | 162782       | 427970       | 9.3        | 2.65E-04 | 1.69E-04 | 2.80E-04 | 3.44E-04 | 6.68E-04 | 1.45E-03 | 6.99E-03 | 7.88E-04 | 8.26E-04 | 1.23E-03 | 1.76E-03 | 2.05E-03 | 2.42E-03 |
| 4           | 5-Aug-10 | 166577       | 428302       | 5.2        | 2.33E-04 | 1.45E-04 | 2.95E-04 | 3.13E-04 | 5.44E-04 | 1.74E-03 | 4.90E-03 | 1.15E-03 | 6.98E-04 | 9.85E-04 | 1.50E-03 | 1.51E-03 | 2.38E-03 |
| 5           | 5-Aug-10 | 166403       | 428011       | 9.5        | 1.90E-04 | 9.84E-05 | 1.86E-04 | 2.21E-04 | 3.91E-04 | 1.19E-03 | 4.66E-03 | 5.41E-04 | 5.88E-04 | 8.44E-04 | 1.00E-03 | 1.46E-03 | 2.15E-03 |
| 6           | 5-Aug-10 | 172006       | 428290       | 4.2        | 3.38E-04 | 2.32E-04 | 3.44E-04 | 4.52E-04 | 7.86E-04 | 2.08E-03 | 4.66E-03 | 1.28E-03 | 1.08E-03 | 2.41E-03 | 3.48E-03 | 4.94E-03 | 7.29E-03 |
| 7           | 5-Aug-10 | 177514       | 430509       | 8.8        | 3.14E-04 | 1.89E-04 | 3.44E-04 | 4.38E-04 | 8.30E-04 | 1.25E-03 | 7.96E-03 | 9.41E-04 | 9.26E-04 | 1.57E-03 | 1.66E-03 | 2.19E-03 | 3.00E-03 |
| 8           | 5-Aug-10 | 177600       | 430500       | 7.9        | 3.63E-04 | 2.07E-04 | 3.62E-04 | 4.93E-04 | 8.09E-04 | 1.64E-03 | 8.46E-03 | 1.20E-03 | 9.90E-04 | 1.74E-03 | 1.74E-03 | 2.42E-03 | 3.02E-03 |
| 9           | 5-Aug-10 | 177283       | 429056       | 5.8        | 2.38E-04 | 1.41E-04 | 2.37E-04 | 3.40E-04 | 6.05E-04 | 1.37E-03 | 4.83E-03 | 9.41E-04 | 1.06E-03 | 2.71E-03 | 3.86E-03 | 5.20E-03 | 7.35E-03 |
| 10          | 5-Aug-10 | 175043       | 432386       | 10.2       | 1.95E-04 | 1.14E-04 | 2.23E-04 | 3.07E-04 | 6.89E-04 | 9.00E-04 | 7.13E-03 | 7.06E-04 | 7.98E-04 | 1.09E-03 | 1.30E-03 | 1.85E-03 | 2.25E-03 |
| 11          | 5-Aug-10 | 172997       | 432098       | 1.3        | 3.66E-04 | 2.41E-04 | 4.39E-04 | 5.73E-04 | 9.86E-04 | 1.48E-03 | 1.32E-03 | 1.00E-03 | 8.28E-04 | 1.04E-03 | 1.10E-03 | 1.25E-03 | 1.17E-03 |
| 12          | 5-Aug-10 | 173672       | 430916       | 5.8        | 2.83E-04 | 1.80E-04 | 3.16E-04 | 3.69E-04 | 7.54E-04 | 1.18E-03 | 5.40E-03 | 1.01E-03 | 1.07E-03 | 1.87E-03 | 2.62E-03 | 3.63E-03 | 5.31E-03 |
| 13          | 5-Aug-10 | 172402       | 430611       | 1.2        | 8.21E-02 | 5.19E-02 | 9.88E-02 | 1.07E-01 | 1.40E-01 | 1.66E-01 | 1.86E-01 | 1.57E-01 | 1.30E-01 | 1.20E-01 | 1.04E-01 | 9.92E-02 | 9.77E-02 |
| 14          | 5-Aug-10 | 169974       | 430540       | 4.5        | 5.25E-04 | 3.20E-04 | 5.54E-04 | 6.08E-04 | 1.01E-03 | 1.83E-03 | 5.36E-03 | 1.28E-03 | 1.07E-03 | 1.88E-03 | 2.52E-03 | 3.74E-03 | 5.60E-03 |
| 15          | 5-Aug-10 | 163808       | 431822       | 6.8        | 2.39E-04 | 1.55E-04 | 2.53E-04 | 3.14E-04 | 6.14E-04 | 1.28E-03 | 4.35E-03 | 6.59E-04 | 6.74E-04 | 1.34E-03 | 2.06E-03 | 2.87E-03 | 3.98E-03 |
| 16          | 5-Aug-10 | 166890       | 431626       | 4.7        | 4.22E-04 | 2.78E-04 | 4.19E-04 | 5.39E-04 | 9.25E-04 | 9.25E-04 | 4.87E-03 | 1.11E-03 | 1.02E-03 | 1.68E-03 | 2.18E-03 | 3.18E-03 | 4.73E-03 |
| 17          | 5-Aug-10 | 159634       | 430524       | 5.0        | 3.45E-04 | 2.91E-04 | 3.67E-04 | 4.48E-04 | 6.46E-04 | 9.50E-04 | 3.48E-03 | 7.29E-04 | 7.22E-04 | 1.17E-03 | 1.80E-03 | 2.45E-03 | 4.10E-03 |
| 18          | 5-Aug-10 | 164366       | 428906       | 1.3        | 2.96E-03 | 2.29E-03 | 3.77E-03 | 4.04E-03 | 6.08E-03 | 6.47E-03 | 7.85E-03 | 6.04E-03 | 4.95E-03 | 4.81E-03 | 4.28E-03 | 4.73E-03 | 5.29E-03 |
| 19          | 5-Aug-10 | 164267       | 429424       | 4.8        | 3.13E-04 | 2.44E-04 | 3.91E-04 | 5.13E-04 | 9.91E-04 | 1.32E-03 | 4.67E-03 | 9.65E-04 | 1.18E-03 | 2.02E-03 | 2.10E-03 | 3.45E-03 | 5.21E-03 |
| 20          | 5-Aug-10 | 164267       | 429424       | 3.9        | 4.52E-04 | 3.41E-04 | 5.11E-04 | 6.42E-04 | 8.68E-04 | 1.42E-03 | 4.37E-03 | 1.24E-03 | 1.14E-03 | 1.66E-03 | 2.14E-03 | 3.19E-03 | 4.13E-03 |
| 21          | 5-Aug-10 | 164086       | 426357       | 30.3       | 2.96E-04 | 2.15E-04 | 3.54E-04 | 4.16E-04 | 7.11E-04 | 1.37E-03 | 2.40E-02 | 7.76E-04 | 7.07E-04 | 8.76E-04 | 1.02E-03 | 1.43E-03 | 1.75E-03 |
| 22          | 5-Aug-10 | 160061       | 426431       | 3.9        | 5.18E-04 | 4.33E-04 | 6.03E-04 | 7.15E-04 | 1.20E-03 | 1.21E-03 | 4.75E-03 | 1.24E-03 | 1.06E-03 | 1.34E-03 | 1.62E-03 | 2.30E-03 | 3.21E-03 |

| location no | date      | X-coord (RD) | Y-coord (RD) | gd anomaly | La       | Ce       | Pr       | Nd       | Sm       | Gd       | Tb       | Dy       | Er       | Tm       | Yb       | Lu       |
|-------------|-----------|--------------|--------------|------------|----------|----------|----------|----------|----------|----------|----------|----------|----------|----------|----------|----------|
| 1           | 22-Oct-10 | 157900       | 425850       | 1.9        | 1.23E-04 | 1.08E-04 | 1.44E-04 | 1.71E-04 | 2.72E-04 | 6.61E-04 | 3.73E-04 | 4.13E-04 | 4.55E-04 | 6.33E-04 | 5.67E-04 | 6.72E-04 |
| 2           | 22-Oct-10 | 162519       | 427478       | 9.0        | 2.45E-05 | 1.50E-05 | 2.54E-05 | 3.38E-05 | 5.28E-05 | 8.28E-04 | 1.12E-04 | 9.93E-05 | 1.55E-04 | 2.67E-04 | 2.87E-04 | 3.48E-04 |
| 3           | 22-Oct-10 | 162782       | 427970       | 8.2        | 2.79E-05 | 1.58E-05 | 2.46E-05 | 3.00E-05 | 5.75E-05 | 7.64E-04 | 1.10E-04 | 1.23E-04 | 1.66E-04 | 2.00E-04 | 2.67E-04 | 3.04E-04 |
| 4           | 22-Oct-10 | 166577       | 428302       | 1.9        | 5.48E-05 | 4.45E-05 | 8.88E-05 | 1.52E-04 | 4.17E-04 | 1.23E-03 | 7.73E-04 | 8.53E-04 | 7.85E-04 | 7.92E-04 | 9.79E-04 | 1.26E-03 |
| 5           | 22-Oct-10 | 166403       | 428011       | 8.8        | 2.52E-05 | 1.92E-05 | 2.81E-05 | 3.51E-05 | 5.58E-05 | 6.42E-04 | 8.16E-05 | 1.08E-04 | 1.28E-04 | 1.75E-04 | 1.79E-04 | 3.44E-04 |
| 6           | 22-Oct-10 | 172006       | 428290       | 2.5        | 6.87E-05 | 5.67E-05 | 6.46E-05 | 8.77E-05 | 1.78E-04 | 4.77E-04 | 2.00E-04 | 2.91E-04 | 5.31E-04 | 6.58E-04 | 8.75E-04 | 1.07E-03 |
| 7           | 22-Oct-10 | 177514       | 430509       | 1.4        | 5.58E-04 | 4.28E-04 | 6.17E-04 | 7.04E-04 | 1.07E-03 | 1.59E-03 | 1.18E-03 | 1.05E-03 | 1.10E-03 | 1.11E-03 | 1.12E-03 | 1.18E-03 |
| 8           | 22-Oct-10 | 177600       | 430500       | 3.7        | 6.18E-05 | 3.82E-05 | 5.52E-05 | 7.42E-05 | 1.06E-04 | 4.70E-04 | 1.37E-04 | 1.69E-04 | 2.11E-04 | 2.58E-04 | 2.49E-04 | 3.96E-04 |
| 9           | 22-Oct-10 | 177283       | 429056       | 2.2        | 1.26E-04 | 8.75E-05 | 1.26E-04 | 1.51E-04 | 2.92E-04 | 6.81E-04 | 3.20E-04 | 3.15E-04 | 3.46E-04 | 4.38E-04 | 4.64E-04 | 6.24E-04 |
| 10          | 22-Oct-10 | 175043       | 432386       | 4.4        | 4.66E-05 | 3.29E-05 | 4.37E-05 | 6.14E-05 | 7.51E-05 | 4.36E-04 | 1.10E-04 | 1.29E-04 | 1.51E-04 | 1.92E-04 | 2.67E-04 | 3.04E-04 |
| 11          | 22-Oct-10 | 172997       | 432098       | 1.3        | 1.42E-04 | 1.16E-04 | 1.53E-04 | 1.94E-04 | 3.47E-04 | 4.69E-04 | 3.59E-04 | 3.94E-04 | 4.28E-04 | 4.04E-04 | 3.47E-04 | 5.04E-04 |
| 12          | 22-Oct-10 | 173672       | 430916       | 1.5        | 4.62E-04 | 3.65E-04 | 5.46E-04 | 6.63E-04 | 1.12E-03 | 1.78E-03 | 1.26E-03 | 1.32E-03 | 1.33E-03 | 1.45E-03 | 1.18E-03 | 1.33E-03 |
| 13          | 22-Oct-10 | 172402       | 430611       | 1.4        | 1.21E-02 | 7.14E-03 | 1.35E-02 | 1.63E-02 | 2.23E-02 | 3.52E-02 | 2.66E-02 | 2.51E-02 | 2.29E-02 | 2.11E-02 | 1.76E-02 | 1.69E-02 |
| 14          | 22-Oct-10 | 169974       | 430540       | 1.3        | 2.62E-04 | 2.34E-04 | 2.98E-04 | 4.09E-04 | 7.41E-04 | 1.10E-03 | 8.61E-04 | 9.03E-04 | 1.01E-03 | 1.02E-03 | 1.08E-03 | 1.16E-03 |
| 15          | 22-Oct-10 | 163808       | 431822       | 2.0        | 3.81E-05 | 2.67E-05 | 3.41E-05 | 4.21E-05 | 7.07E-05 | 1.32E-04 | 6.12E-05 | 6.46E-05 | 1.01E-04 | 1.71E-04 | 1.77E-04 | 2.12E-04 |
| 16          | 22-Oct-10 | 166890       | 431626       | 2.4        | 5.91E-05 | 4.27E-05 | 5.34E-05 | 6.26E-05 | 1.39E-04 | 3.36E-04 | 1.43E-04 | 1.87E-04 | 2.55E-04 | 2.38E-04 | 3.12E-04 | 3.48E-04 |
| 17          | 22-Oct-10 | 159634       | 430524       | 1.2        | 4.91E-05 | 2.92E-05 | 5.49E-05 | 8.27E-05 | 1.85E-04 | 3.58E-04 | 3.43E-04 | 2.80E-04 | 2.59E-04 | 4.04E-04 | 3.11E-04 | 3.64E-04 |
| 18          | 22-Oct-10 | 164366       | 428906       | 1.3        | 8.92E-04 | 6.65E-04 | 1.05E-03 | 1.26E-03 | 1.97E-03 | 2.80E-03 | 2.24E-03 | 2.32E-03 | 2.43E-03 | 2.50E-03 | 2.65E-03 | 2.81E-03 |
| 19          | 22-Oct-10 | 164267       | 429424       | 1.7        | 1.21E-04 | 9.53E-05 | 1.31E-04 | 1.74E-04 | 2.68E-04 | 5.91E-04 | 3.82E-04 | 4.06E-04 | 4.64E-04 | 5.00E-04 | 5.42E-04 | 5.56E-04 |
| 20          | 22-Oct-10 | 164267       | 429424       | 3.1        | 4.03E-05 | 2.87E-05 | 4.56E-05 | 5.33E-05 | 8.94E-05 | 4.19E-04 | 1.57E-04 | 1.31E-04 | 2.54E-04 | 3.42E-04 | 3.63E-04 | 5.32E-04 |
| 21          | 22-Oct-10 | 164086       | 426357       | 1.1        | 1.29E-04 | 1.10E-04 | 1.60E-04 | 2.26E-04 | 3.76E-04 | 5.63E-04 | 5.69E-04 | 6.18E-04 | 6.18E-04 | 1.17E-03 | 1.18E-03 | 1.66E-03 |
| 22          | 22-Oct-10 | 160061       | 426431       | 1.3        | 3.53E-03 | 3.32E-03 | 4.12E-03 | 4.84E-03 | 7.11E-03 | 9.31E-03 | 6.87E-03 | 6.60E-03 | 6.07E-03 | 5.68E-03 | 5.54E-03 | 5.67E-03 |
